# Supplementary material
Source: publisher figshare collection journal article supplement (https://tandf.figshare.com/ndownloader/files/13596305)
Supplement: Supplementary file 1 [file 13596305]

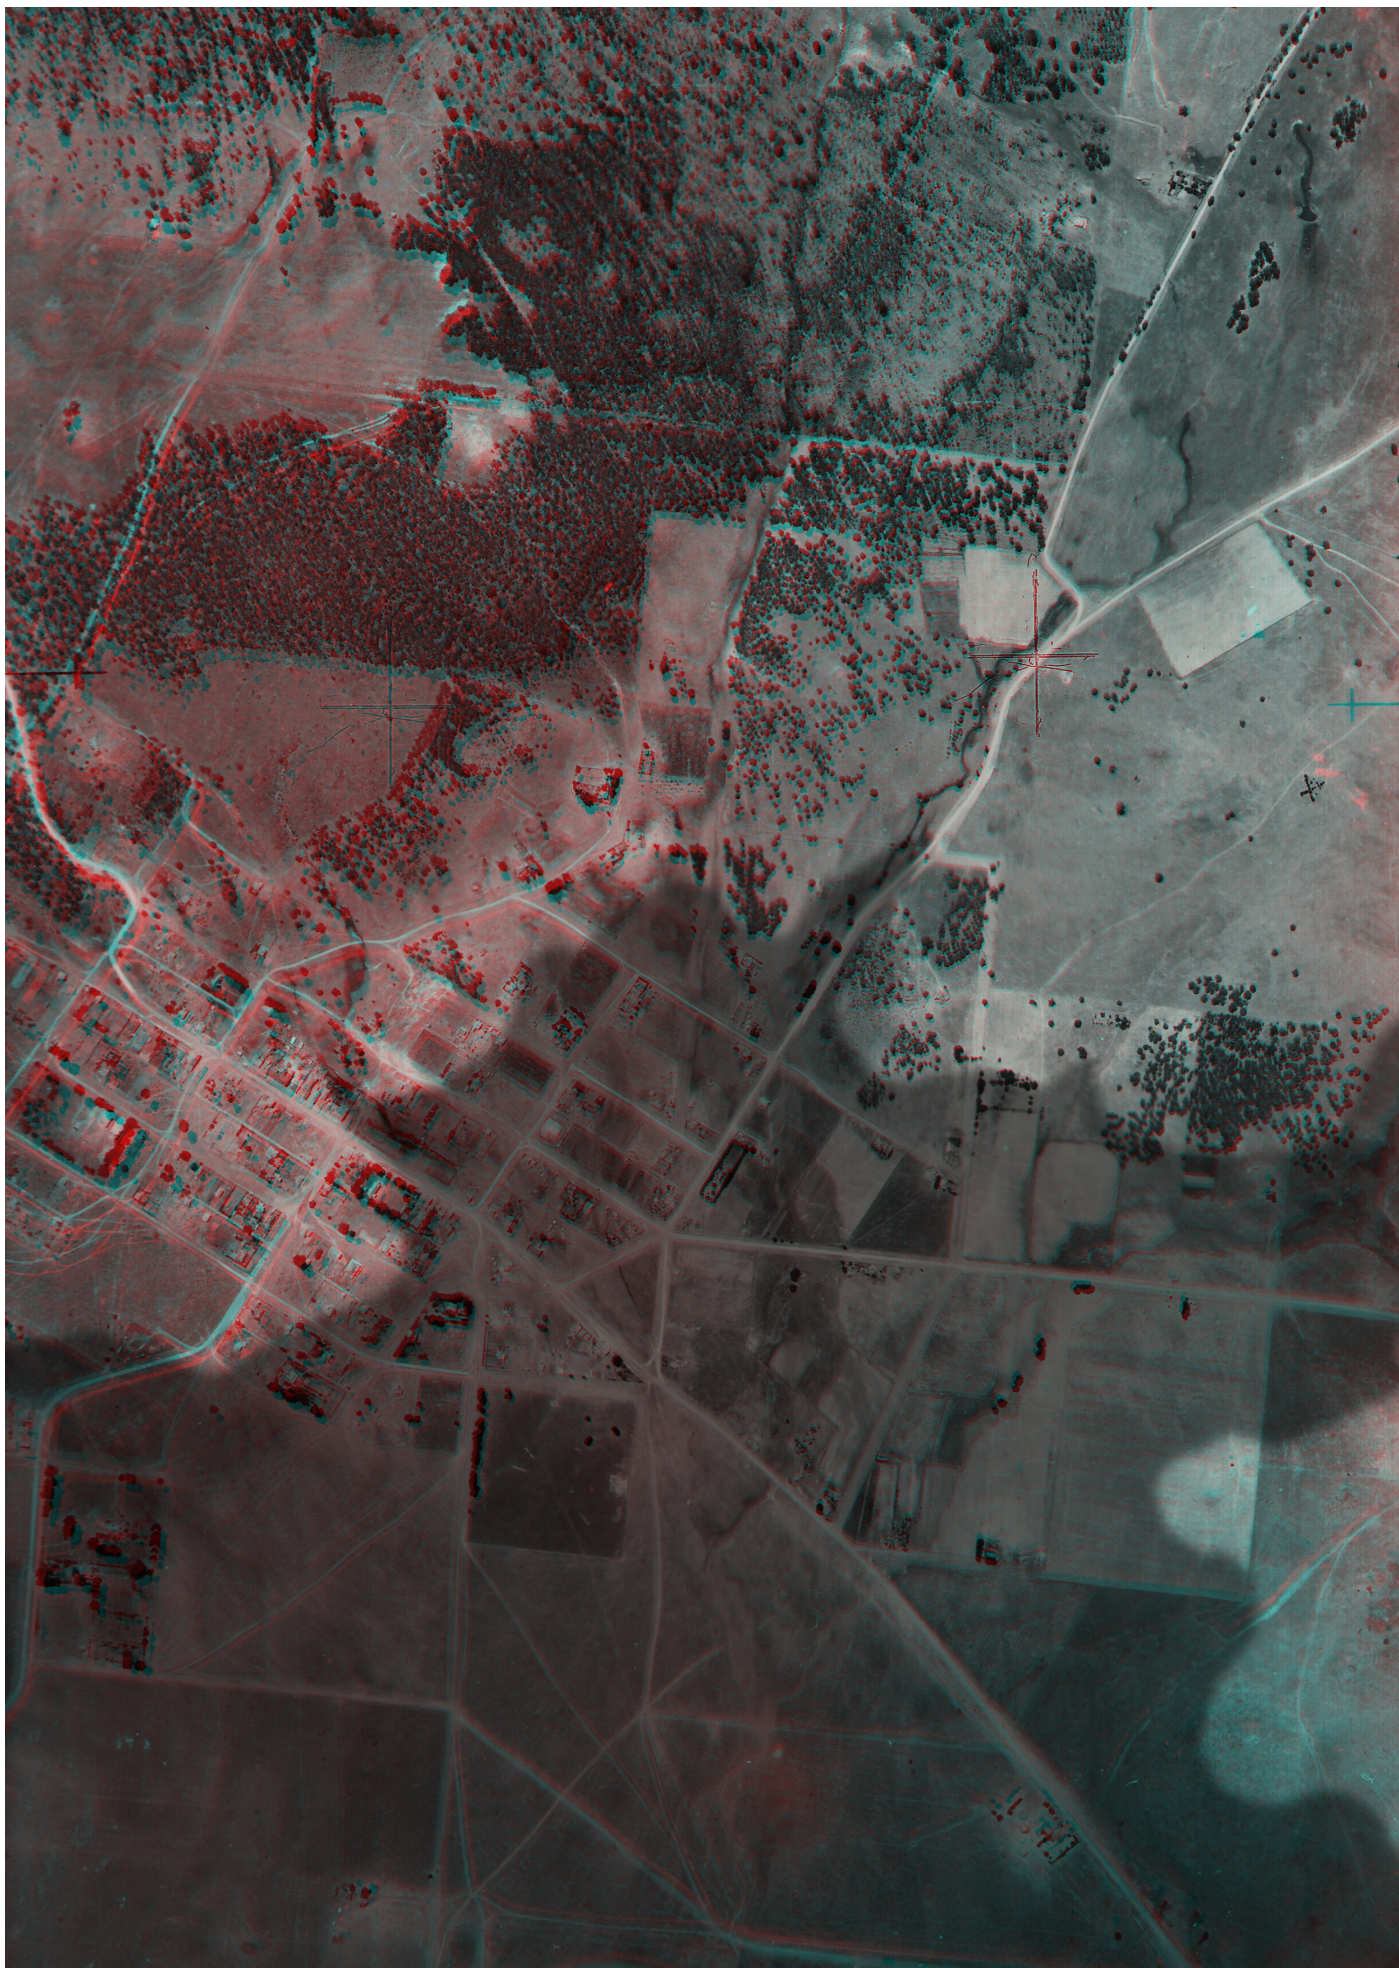

'Old Adaminaby (1944)' depicts an area now partially filled by a reservoir, Lake Eucumbene. The town of Old Adaminaby (pictured) was relocated to make way for the reservoir and people were still living in this town at the time the photographs were taken. The dark shadowy area in this image represents the contemporary inundation extent of the lake, which slowly crept up over the town from 1958. From time to time, in periods of low rainfall, the waters of Lake Eucumbene recede and the ruins of Old Adaminaby re-emerge, neither wholly human or natural, but a kind of halfway place where physical and social agencies intersect. Best viewed with red/cyan 3D glasses. Author: Simon Mould. Copyright Simon Mould and Journal of Maps 2017.
